# Supplementary material for: Functionalization of the alicyclic skeleton of epibatidine: synthesis and nicotinic acetylcholine receptor binding affinities of epibatidine analoguesElectronic supplementary information (ESI) available: detailed experimental procedures with spectroscopic data, and crystal data for compounds 11 and 4a. See http://www.rsc.org/suppdata/ob/b3/b308906a/Dedicated to Dr John W. Daly of the NIH, who first discovered epibatidine.
Source: Royal Society of Chemistry journal article supplement (doi:10.1039/b308906a), 2003-01-01
Supplement: b308906a.doc [file b308906a.doc]

Supporting Information

**Functionalization of the alicyclic skeleton of epibatidine: synthesis and nicotinic acetylcholine receptor binding affinities of epibatidine analogues†**

Zhi-Liang Wei,*a* Yingxian Xiao,*b* Clifford George,*c* Kenneth J. Kellar*b*

and Alan P. Kozikowski*,*a*

* To whom correspondence should be addressed.

† Dedicated to Dr. John W. Daly of the NIH, who first discovered epibatidine.

*a* Department of Medicinal Chemistry and Pharmacognosy, College of Pharmacy, University of Illinois at Chicago, 833 S. Wood Street, Chicago, Illinois 60612-7231, USA. Fax: +1-312-996-7107; Tel: +1-312-996-5972; E-mail: kozikowa@uic.edu.

*b* Department of Pharmacology, Georgetown University, 3900 Reservoir Road, NW, Washington, D.C. 20057, USA.

*c* Naval Research Laboratory, 4555 Overlook Ave., SW, Washington, D.C. 20375, USA.

#### Experimental Procedures

**General.** 1H, 13C, and 19F NMR spectra were obtained with a Varian Unity Inova instrument at 300, 75, and 282 MHz, respectively. 1H chemical shifts () were reported in ppm with Me4Si ( = 0.00 ppm) or CHCl3 ( = 7.26 ppm) as internal standards, 13C chemical shifts with CDCl3 ( = 77.00 ppm) or TMS ( = 0.00 ppm) as internal standards, and 19F chemical shifts with CF3CO2H ( = 0.00 ppm) as an external standard. TLC was performed on Merck silica gel 60 F254 glass plates; column chromatography was performed using Merck silica gel (35-75 mesh).

**7-*tert*-Butoxycarbonyl-2-*exo*-(2-chloro-5-pyridyl)-3-*endo*-(*p*-tolylsulfonyl)-7-azabicyclo[2.2.1]heptane (8).** To a stirred solution of 5-iodo-2-chloropyridine (4.5 g, 19 mmol) in THF (135 mL) under N2 at 78 C was added dropwise *n*-BuLi (2.5 M in hexanes, 9.0 mL, 22 mmol). After 30 min a solution of the alkenyl sulfone **7** (5.7 g, 16 mmol) in THF (60 mL) was added dropwise to the metallated pyridine. After 1 h at 78 C, sat. aq. NaHCO3 (20 mL) was added and the solution was warmed to room temperature. The mixture was concentrated *in vacuo*, diluted with brine (100 mL), and extracted with EtOAc (3  100 mL). The combined organic layers were washed with brine, dried over MgSO4, filtered and concentrated. The residue was purified by chromatography with CHCl3-hexane-diethyl ether (8:6:1) to give **8** as a white foam (6.5 g, 86%). 1H NMR (CDCl3)  8.18 (s, 1H), 7.66 and 7.28 (AB, 4H, *J* = 8.1 Hz), 7.54 (dd, 1H, *J* = 8.1, 1.8 Hz), 7.17 (d, 1H, *J* = 8.1 Hz), 4.44 (s, 1H), 4.28 (d, 1H, *J* = 4.5 Hz), 3.58 (t, 1H, *J* = 4.5 Hz), 3.32 (s, 1H), 2.67 (m, 1H), 2.41 (s, 3H), 2.05-1.70 (m, 3H), 1.42 (s, 9H).

**7-*tert*-Butoxycarbonyl-2-(2-chloro-5-pyridyl)-7-azabicyclo[2.2.1]hept-2-ene (9).** To a stirred solution of **8** (400 mg, 0.86 mmol) in THF (40 mL) was added *t*-BuOK (350 mg, 3.12 mmol) in one portion under N2 at 78 C. The reaction mixture was warmed slowly to room temperature and stirred at room temperature for 1 h. Then sat. aq. NH4Cl (5 mL) was added and the mixture was concentrated. The residue was dissolved in EtOAc (50 mL) and washed with brine, dried over Na2SO4, concentrated, and purified by chromatography with hexane-EtOAc (5:1) to give **9** as a syrup (260 mg, 98%). 1H NMR (CDCl3)  8.42 (d, 1H, *J* = 2.4 Hz), 7.64 (dd, 1H, *J* = 8.4, 2.4 Hz), 7.30 (d, 1H, *J* = 8.4 Hz), 6.56 (s, 1H), 5.04 (s, 1H), 4.82 (s, 1H), 2.11-1.96 (m, 2H), 1.42 (s, 9H), 1.36-1.16 (m, 2H). 13C NMR (CDCl3)  155.08, 150.15, 146.22, 143.57, 135.28, 130.86, 127.97, 124.31, 80.27, 61.15, 60.40, 28.19, 25.70, 24.21.

**7-*tert*-Butoxycarbonyl-2-*endo*-(2-chloro-5-pyridyl)-3-*exo*-hydroxyl-7-azabicyclo[2.2.1]heptane (10).** To a solution of the olefin **9** (1.80 g, 5.9 mmol) in anhydrous THF (50 mL) was added dropwise borane-THF complex (1.0 M in THF, 18 mL, 18 mmol) under N2 at 78 C. The reaction mixture was slowly warmed to room temperature and stirred at room temperature overnight. Then the reaction mixture was quenched by sequential addition of water (15 mL), sodium hydroxide solution (6.0 M, 15 mL), ethanol (10 mL), and 35% of hydrogen peroxide solution (15 mL). The mixture was stirred for a further 30 min, and then diluted with EtOAc (200 mL). The organic layer was separated and washed with brine, dried over Na2SO4, and concentrated. The residue was purified by chromatography with hexane-EtOAc (2:1) to give **10** as a syrup (1.20 g, 63%). 1H NMR (CDCl3)  8.24 (d, 1H, *J* = 2.4 Hz), 7.48 (dd, 1H, *J* = 8.1, 2.4 Hz), 7.30 (d, 1H, *J* = 8.1 Hz), 4.40 (t, 1H, *J* = 4.2 Hz), 4.24 (d, 1H, *J* = 4.5 Hz), 4.05 (s, 1H), 3.20 (s, 1H), 2.5 (br s, 1H), 1.85 (m, 1H), 1.56 (m, 1H), 1.48 (s, 9H), 1.36-1.25 (m, 2H). 13C NMR (CDCl3)  156.43, 150.03, 149.31, 138.60, 133.13, 124.27, 80.71, 79.15, 64.40, 59.90, 56.39, 28.45, 25.07, 22.39.

**7-*tert*-Butoxycarbonyl-2-*endo*-(2-chloro-5-pyridyl)-7-azabicyclo[2.2.1]heptan-3-one (12).** To a solution of the alcohol **10** (730 mg, 2.2 mmol) in CH2Cl2 (50 mL) was added Dess-Martin periodinane (1.2 g, 2.8 mmol) and the reaction mixture was stirred at room temperature for 4 h. After removal of most of the solvent *in vacuo*, the residue was passed through a short silica gel column. The crude product was further purified by chromatography with hexane-EtOAc (4:1) to give **12** as a syrup (700 mg, 96%). 1H NMR (CDCl3)  8.25 (d, 1H, *J* = 2.4 Hz), 7.55 (dd, 1H, *J* = 8.4, 2.4 Hz), 7.34 (d, 1H, *J* = 8.4 Hz), 4.75 (t, 1H, *J* = 4.8 Hz), 4.44 (d, 1H, *J* = 5.4 Hz), 3.85 (d, 1H, *J* = 5.1 Hz), 2.23-2.10 (m, 1H), 1.88-1.75 (m, 1H), 1.71-1.60 (m, 1H), 1.56-1.43 (m, 1H), 1.50 (s, 9H). 13C NMR (CDCl3)  208.23, 154.87, 150.86, 149.95, 138.79, 129.06, 124.55, 81.73, 64.97, 60.58, 55.88, 28.36, 25.32, 22.76.

**7-*tert*-Butoxycarbonyl-2-*exo*-(2-chloro-5-pyridyl)-7-azabicyclo[2.2.1]heptan-3-one (13).** A solution of **12** (200 mg, 0.62 mmol) in CH2Cl2 was loaded on a precoated silica gel plate (size: 20 x 20 cm; layer thickness: 250 m. Silica Gel 60 F254, Merck Co.). After 2 days at room temperature, the silica gel was removed and washed with EtOAc, and the solution was concentrated. The residue was purified by chromatography with hexane-EtOAc (5:1) to give the recovered starting material **12** (74 mg, 37%), followed by **13** as a white solid (126 mg, 63%). 1H NMR (CDCl3)  8.36 (d, 1H, *J* = 2.4 Hz), 7.64 (dd, 1H, *J* = 8.4, 2.4 Hz), 7.28 (d, 1H, *J* = 8.4 Hz), 4.72 (s, 1H), 4.43 (d, 1H, *J* = 3.6 Hz), 3.18 (s, 1H), 2.20-2.0 (m, 2H), 1.90-1.75 (m, 2H), 1.45 (s, 9H). 13C NMR (CDCl3)  206.07, 154.73, 150.59, 149.16, 137.84, 130.57, 124.40, 81.60, 63.41, 60.58, 56.87, 28.35, 28.17, 24.70. Anal. Calcd for (C16H19ClN2O3·1/5H2O) C, 58.88; H, 5.99; N, 8.58. Found: C, 59.08; H, 5.81; N, 8.54.

**7-*tert*-Butoxycarbonyl-2-*endo*-(2-chloro-5-pyridyl)-3-*endo*-hydroxyl-7-azabicyclo[2.2.1]heptane (14).** To a stirred solution of **12** (120 mg, 0.37 mmol) in anhydrous THF (10 mL) was added L-Selectride (1.0 M in THF, 520 L, 0.52 mmol) under N2 at 30 C. The reaction mixture was slowly warmed to 0 C in 1 h. Ethanol (2 mL) was added, followed by saturated aq. NH4Cl (2 mL) and then diluted with EtOAc (50 mL). The organic layer was separated and washed with brine, dried over Na2SO4, and concentrated. The residue was purified by chromatography with hexane-EtOAc (30:1) to give **14** as a syrup (110 mg, 91%). 1H NMR (CDCl3)  8.22 (d, 1H, *J* = 2.4 Hz), 7.68 (dd, 1H, *J* = 8.4, 2.4 Hz), 7.24 (d, 1H, *J* = 8.4 Hz), 4.58 (m, 1H), 4.33 (t, 1H, *J* = 4.5 Hz), 4.21 (s, 1H), 3.34 (dd, 1H, *J* = 9.6, 4.5 Hz), 3.28 (d, 1H, *J* = 3.9 Hz), 2.23 (m, 1H), 1.76-1.53 (m, 3H), 1.47 (s, 9H). Anal. Calcd for (C16H21ClN2O3·1/4H2O) C, 58.36; H, 6.58; N, 8.51. Found: C, 58.48; H, 6.68; N, 8.33.

**7-*tert*-Butoxycarbonyl-2-*exo*-(2-chloro-5-pyridyl)-3-*exo*-hydroxyl-7-azabicyclo[2.2.1]heptane (16).** To a stirred solution of **13** (40 mg, 0.12 mmol) in anhydrous THF (4 mL) at 78 C under N2 was added L-Selectride (1.0 M in THF, 160 L, 0.16 mmol). The reaction mixture was slowly warmed to room temperature in 1 h. After this time, the solution was cooled to 0 C and ethanol (0.5 mL) was added, followed by saturated aq. NH4Cl (0.5 mL) and then diluted with EtOAc (30 mL). The organic layer was separated and washed with brine, dried over Na2SO4, and concentrated. The residue was purified by chromatography with hexane-EtOAc (2:1) to give the alcohol **16** as a syrup (37 mg, 92%). 1H NMR (CDCl3)  8.21 (d, 1H, *J* = 2.1 Hz), 7.70 (d, 1H, *J* = 6.9 Hz), 7.28 (d, 1H, *J* = 8.4 Hz), 4.30 (d, 1H, *J* = 3.0 Hz), 4.19 (d, 1H, *J* = 5.1 Hz), 4.08 (t, 1H, *J* = 7.5 Hz), 3.04 (d, 1H, *J* = 7.5 Hz), 1.95-1.70 (m, 3H), 1.58-1.50 (m, 2H), 1.48 (s, 9H). 13C NMR (CDCl3)  156.09, 150.01, 149.95, 139.49, 133.14, 124.07, 80.69, 76.12, 63.16, 61.15, 51.92, 29.22, 28.49, 24.31. Anal. Calcd for (C16H21ClN2O3·1/5H2O) C, 58.52; H, 6.57; N, 8.53. Found: C, 58.29; H, 6.27; N, 8.25.

**7-*tert*-Butoxycarbonyl-2-*exo*-(2-chloro-5-pyridyl)-3-*endo*-hydroxyl-7-azabicyclo[2.2.1]heptane (17).** To a stirred solution of **13** (40 mg, 0.12 mmol) in THF (5 mL) was added NaBH4 (20 mg, 0.5 mmol) and water (200 L) and the reaction mixture was stirred at room temperature for 1 h. After that water (5 mL) was added and neutralized to pH 7.0 with 1 M aq. HCl. (0.5 mL). The mixture was extracted with EtOAc (3  10 mL). The combined organic layer was washed with brine, dried over Na2SO4, and concentrated. The residue was purified by chromatography with hexane-EtOAc (2:1) to give **17** as a syrup (29 mg, 72%) followed with **16** (9 mg, 23%). 1H NMR (CDCl3)  8.21 (d, 1H, *J* = 2.4 Hz), 7.66 (dd, 1H, *J* = 8.4, 2.4 Hz), 7.25 (d, 1H, *J* = 8.4 Hz), 4.27 (t, 1H, *J* = 3.9 Hz), 4.15-4.08 (m, 2H), 3.47 (d, 1H, *J* = 4.5 Hz), 2.43 (d, 1H, *J* = 3.6 Hz), 2.30-2.20 (m, 1H), 1.93-1.78 (m, 1H), 1.75-1.65 (m, 2H), 1.44 (s, 9H). 13C NMR (CDCl3)  155.61, 149.65, 148.52, 138.89, 137.47, 124.55, 80.57, 80.14, 63.10, 60.44, 54.20, 30.39, 28.45, 20.47. Anal. Calcd for (C16H21ClN2O3·1/10H2O) C, 58.84; H, 6.54; N, 8.58. Found: C, 58.58; H, 6.28; N, 8.42.

**7-*tert*-Butoxycarbonyl-2-*exo*-(2-chloro-5-pyridyl)-5-*exo*-fluoro-7-azabicyclo[2.2.1]heptane (19).** To a stirred solution of **18** (42 mg, 0.13 mmol) in dry CH2Cl2 (3 mL) at 78C under N2 was slowly added diethylaminosulfur trifluoride (66 L, 0.5 mmol). The reaction mixture was stirred at 78C for 1 h, and then warmed slowly to room temperature. After that the reaction mixture was quenched by adding saturated aqueous NaHCO3, and diluted with EtOAc. The organic layer was washed with brine, dried over Na2SO4, and concentrated. The residue was purified by chromatography with hexane-EtOAc (5:1) to give **19** (35 mg, 87%). 1H NMR (CDCl3)  8.29 (d, 1H, *J* = 2.4 Hz), 7.61 (dd, 1H, *J* = 8.4, 2.4 Hz), 7.27 (d, 1H, *J* = 8.4 Hz), 5.14 (d, 1H, *J* = 57.3 Hz), 4.53 (s, 1H), 4.16 (s, 1H), 3.06 (dd, 1H, *J* = 9.3, 5.1 Hz), 2.67 (ddd, 1H, *J* = 13.2, 9.3, 2.4 Hz), 2.35 (m, 1H), 1.80 (m, 1H), 1.62 (ddd, 1H, *J* = 24.9, 13.8, 2.1 Hz), 1.42 (s, 9H). 13C NMR (CDCl3)  154.59, 149.87, 148.92, 139.63, 137.45, 124.40, 90.14 (d, *J* = 191 Hz), 80.97, 62.24, 58.32, 44.59, 38.10, 31.77, 28.43. 19F NMR (CDCl3)  114 (d, *J* = 191 Hz).

**7-*tert*-Butoxycarbonyl-2-*exo*-(2-chloro-5-pyridyl)-6-*exo*-fluoro-7-azabicyclo[2.2.1]heptane (21).** Yield, 83%.1H NMR (CDCl3)  8.31 (d, 1H, *J* = 2.4 Hz), 7.62 (dd, 1H, *J* = 8.4, 2.4 Hz), 7.27 (d, 1H, *J* = 8.4 Hz), 5.12 (d, 1H, *J* = 57 Hz), 4.37 (s, 1H), 4.32 (s, 1H), 3.62 (dd, 1H, *J* = 9.0, 5.1 Hz), 2.30 (m, 1H), 2.19 (dd, 1H, *J* = 12.3, 9.0 Hz), 1.95 (m, 1H), 1.53 (ddd, 1H, *J* = 25.2, 13.8, 2.4 Hz), 1.41 (s, 9H). 13C NMR (CDCl3)  154.59, 149.87, 149.25, 138.99, 137.93, 124.35, 90.06 (d, *J* = 194 Hz), 80.97, 63.75, 56.85, 39.78, 36.54, 35.95, 28.41. 19F NMR (CDCl3)  115 (d, *J* = 293 Hz).

**2-*endo*-(2-Chloro-5-pyridyl)-3-*exo*-hydroxyl-7-azabicyclo[2.2.1]heptane (11).**

**General procedure for removal of Boc group:** To a solution of **10** (90 mg, 0.28 mmol) in CH2Cl2 (6 mL) under N2 was added trifluoroacetic acid (500 L). The reaction mixture was stirred at room temperature for 3 h and then rendered basic with saturated aq. Na2CO3. The mixture was diluted with EtOAc (100 mL) and the organic phase was washed with brine, dried over Na2SO4, and concentrated. The residue was purified by chromatography with CH2Cl2-MeOH (2:1) to give **11** (58 mg, 94%). 1H NMR (CDCl3)  8.23 (d, 1H, *J* = 2.4 Hz), 7.45 (dd, 1H, *J* = 8.4, 2.4 Hz), 7.29 (d, 1H, *J* = 8.4 Hz), 4.00 (d, 1H, *J* = 3.0 Hz), 4.78 (t, 1H, *J* = 4.5 Hz), 3.57 (d, 1H, *J* = 5.7 Hz), 2.99 (s, 1H), 2.35 (br s, 2H), 1.76-1.62 (m, 1H), 1.46-1.15 (m, 3H). 13C NMR (CDCl3)  149.78, 149.37, 138.42, 134.08, 124.17, 78.88, 64.78, 60.38, 57.73, 25.43, 23.12. Anal. Calcd for (C11H13ClN2O·1/4HCl) C, 56.51; H, 5.71; N, 11.98. Found: C, 56.86; H, 5.31; N, 11.64.

**2-*endo*-(2-Chloro-5-pyridyl)-3-*endo*-hydroxyl-7-azabicyclo[2.2.1]heptane (15).** Yield, 95%. 1H NMR (CDCl3)  8.23 (d, 1H, *J* = 2.4 Hz), 7.66 (dd, 1H, *J* = 8.4, 2.4 Hz), 7.26 (d, 1H, *J* = 8.4 Hz), 4.46 (dd, 1H, *J* = 9.0, 3.9 Hz), 3.75 (s, 1H), 3.64 (s, 1H), 3.18 (dd, 1H, *J* = 8.4, 3.9 Hz), 2.49 (br s, 2H), 2.20 (m, 1H), 1.69 (m, 1H), 1.56-1.38 (m, 2H). 13C NMR (CDCl3)  151.91, 149.57, 141.75, 132.10, 123.46, 70.86, 62.54, 61.88, 47.54, 24.02, 21.76. Anal. Calcd for (C11H13ClN2O·1/3H2O) C, 57.27; H, 5.97; N, 12.14. Found: C, 56.99; H, 5.89; N, 11.74.

**2-*exo*-(2-Chloro-5-pyridyl)-3-*exo*-hydroxyl-7-azabicyclo[2.2.1]heptane (4a).** Yield, 90%. 1H NMR (CDCl3)  8.25 (d, 1H, *J* = 2.4 Hz), 7.70 (dd, 1H, *J* = 8.1, 2.4 Hz), 7.26 (d, 1H, *J* = 8.1 Hz), 3.98 (d, 1H, *J* = 6.9 Hz), 3.67 (s, 1H), 3.59 (d, 1H, *J* = 5.1 Hz), 2.90 (d, 1H, *J* = 6.9 Hz), 2.06 (br s, 2H), 1.71-1.62 (m, 1H), 1.58-1.50 (m, 2H), 1.48-1.38 (m, 1H). 13C NMR (CDCl3)  150.13, 149.53, 139.47, 134.31, 123.90, 76.40, 63.02, 61.53, 51.48, 31.30, 25.08. Anal. Calcd for (C11H13ClN2O·1/2H2O) C, 56.53; H, 6.04; N, 11.99. Found: C, 56.92; H, 5.99; N, 11.69.

**2-*exo*-(2-Chloro-5-pyridyl)-3-*endo*-hydroxyl-7-azabicyclo[2.2.1]heptane (4b).** Yield, 93%. 1H NMR (CDCl3)  8.29 (d, 1H, *J* = 2.4 Hz), 7.84 (dd, 1H, *J* = 8.4, 2.4 Hz), 7.24 (d, 1H, *J* = 8.4 Hz), 4.08 (td, 1H, *J* = 4.2, 1.2 Hz), 3.68 (t, 1H, *J* = 4.5 Hz), 3.54 (d, 1H, *J* = 4.5 Hz), 2.32 (br s, 2H), 2.29 (d, 1H, *J* = 3.9 Hz), 2.24 (ddd, 1H, *J* = 12.6, 8.7, 5.7 Hz), 1.74 (m, 1H), 1.65 (tt, 1H. *J* = 12.0, 4.8 Hz), 1.50 (tt, 1H, *J* = 12.0, 4.5 Hz). 13C NMR (CDCl3)  149.42, 148.78, 139.72, 137.95, 124.30, 81.16, 64.25, 60.92, 53.54, 32.46, 22.13. Anal. Calcd for (C11H13ClN2O·1/2H2O) C, 56.53; H, 6.04; N, 11.99. Found: C, 56.48; H, 5.70; N, 11.73.

**2-*exo*-(2-Chloro-5-pyridyl)-5-*exo*-fluoro-7-azabicyclo[2.2.1]heptane (5a).** Yield, 87%. 1H NMR (CDCl3)  8.32 (d, 1H, *J* = 2.7 Hz), 7.73 (dd, 1H, *J* = 8.4, 2.7 Hz), 7.26 (d, 1H, *J* = 8.4 Hz), 5.08 (dddd, 1H, *J* = 57.6, 7.2, 4.8, 2.4 Hz), 3.88 (t, 1H, *J* = 4.8 Hz), 3.50 (d, 1H, *J* = 5.1 Hz), 2.99 (dd, 1H, *J* = 9.3, 5.1 Hz), 2.61 (ddd, 1H, *J* = 12.9, 9.0, 2.4 Hz), 2.11 (m, 1H), 1.65 (br s, 1H), 1.61 (dd, 1H, *J* =13.5, 5.7 Hz), 1.55 (ddd, 1H, *J* = 24.9, 13.8, 2.4 Hz). 13C NMR (CDCl3)  149.52, 148.95, 140.78, 137.89, 124.26, 92.69 (d, *J* = 189 Hz), 63.13 (d, *J* = 3 Hz), 59.08 (d, *J* = 20 Hz), 44.36, 39.25 (d, *J* = 24 Hz), 32.05 (d, *J* = 8 Hz). 19F NMR (CDCl3)  113 (dt, *J* = 58, 21 Hz). Anal. Calcd for (C11H12ClFN2·0.5H2O) C, 57.15; H, 5.45; N, 12.12. Found: C, 57.14; H, 5.54; N, 11.85.

**2-*exo*-(2-Chloro-5-pyridyl)-6-*exo*-fluoro-7-azabicyclo[2.2.1]heptane (5b).** Yield, 92%.1H NMR (CDCl3)  8.35 (d, 1H, *J* = 2.4 Hz), 7.74 (dd, 1H, *J* = 8.4, 2.4 Hz), 7.26 (d, 1H, *J* = 8.4 Hz), 5.06 (dddd, 1H, *J* = 58, 9.9, 4.8, 2.7 Hz), 3.76 (t, 1H, *J* = 4.8 Hz), 3.64 (d, 1H, *J* = 4.5 Hz), 3.56 (dd, 1H, *J* = 9.0, 5.4 Hz), 2.14 (dd, 1H, *J* = 12.6, 9.0 Hz), 2.10 (m, 1H), 1.78 (m, 1H), 1.70 (br s, 1H), 1.46 (ddd, 1H, *J* = 25.2, 13.5, 2.7 Hz). 13C NMR (CDCl3)  149.54, 149.25, 140.18, 138.30, 124.23, 92.59 (d, *J* = 191 Hz), 65.30 (d, *J* = 19 Hz), 57.32 (d, *J* = 3 Hz), 40.10, 37.45 (d, *J* = 23 Hz), 35.57 (d, *J* = 8 Hz). 19F NMR (CDCl3)  115 (ddd, *J* = 58, 25, 15 Hz). Anal. Calcd for (C11H12ClFN2·0.3H2O) C, 56.93; H, 5.47; N, 12.07. Found: C, 57.19; H, 5.56; N, 11.67.
